# Supplementary material for: A cyanide-selective colorimetric “naked-eye” and fluorescent chemosensor based on a diketopyrrolopyrrole–hydrazone conjugate and its use for the design of a molecular-scale logic device
Source: Royal Society of Chemistry journal article supplement (doi:10.1039/c6ra21669b), 2016-01-01
Supplement: c6ra21669b1.pdf [file c6ra21669b1.pdf]

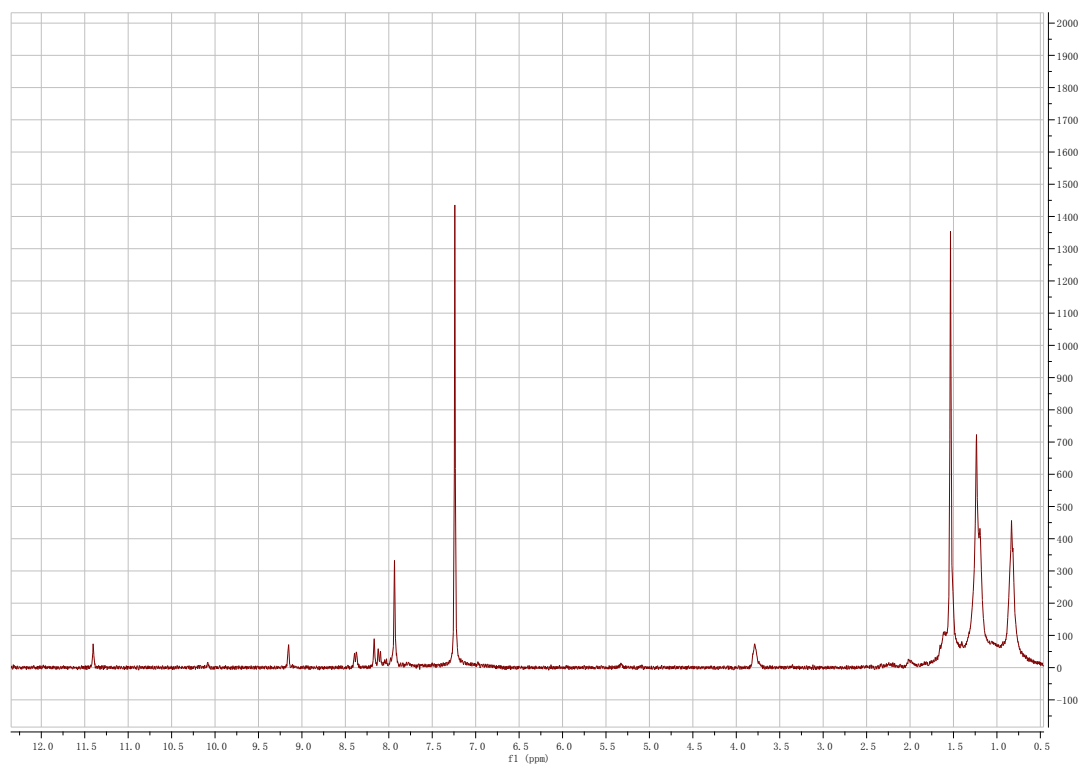

Figure S1.  $^1\text{H}$  NMR spectrum of receptor **1** ( $\text{CDCl}_3$ , 400 MHz).

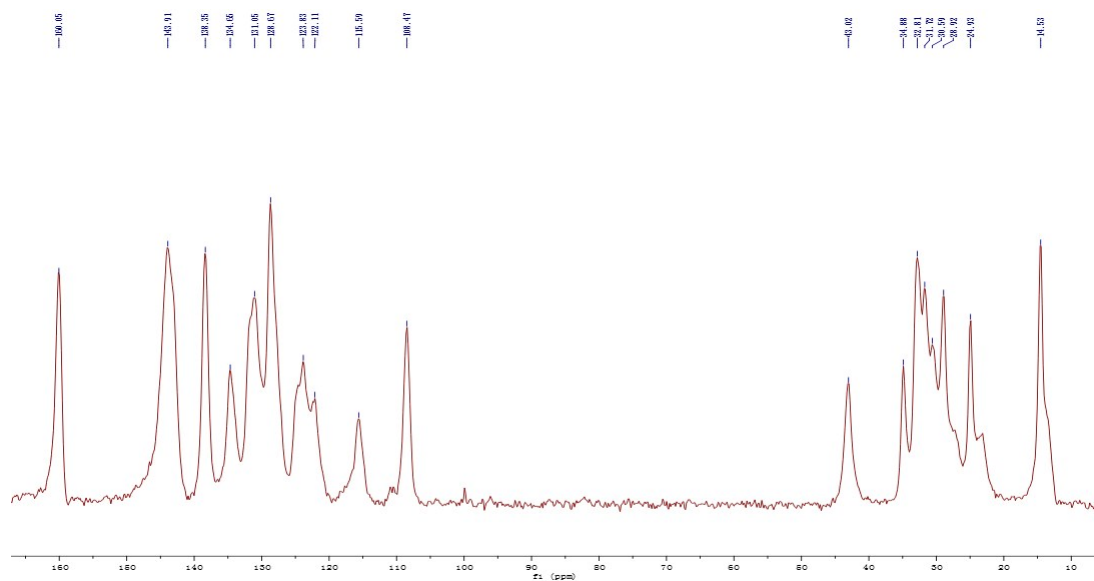

Figure S2.  $^{13}\text{C}$  NMR spectrum of receptor **1** in solid state.

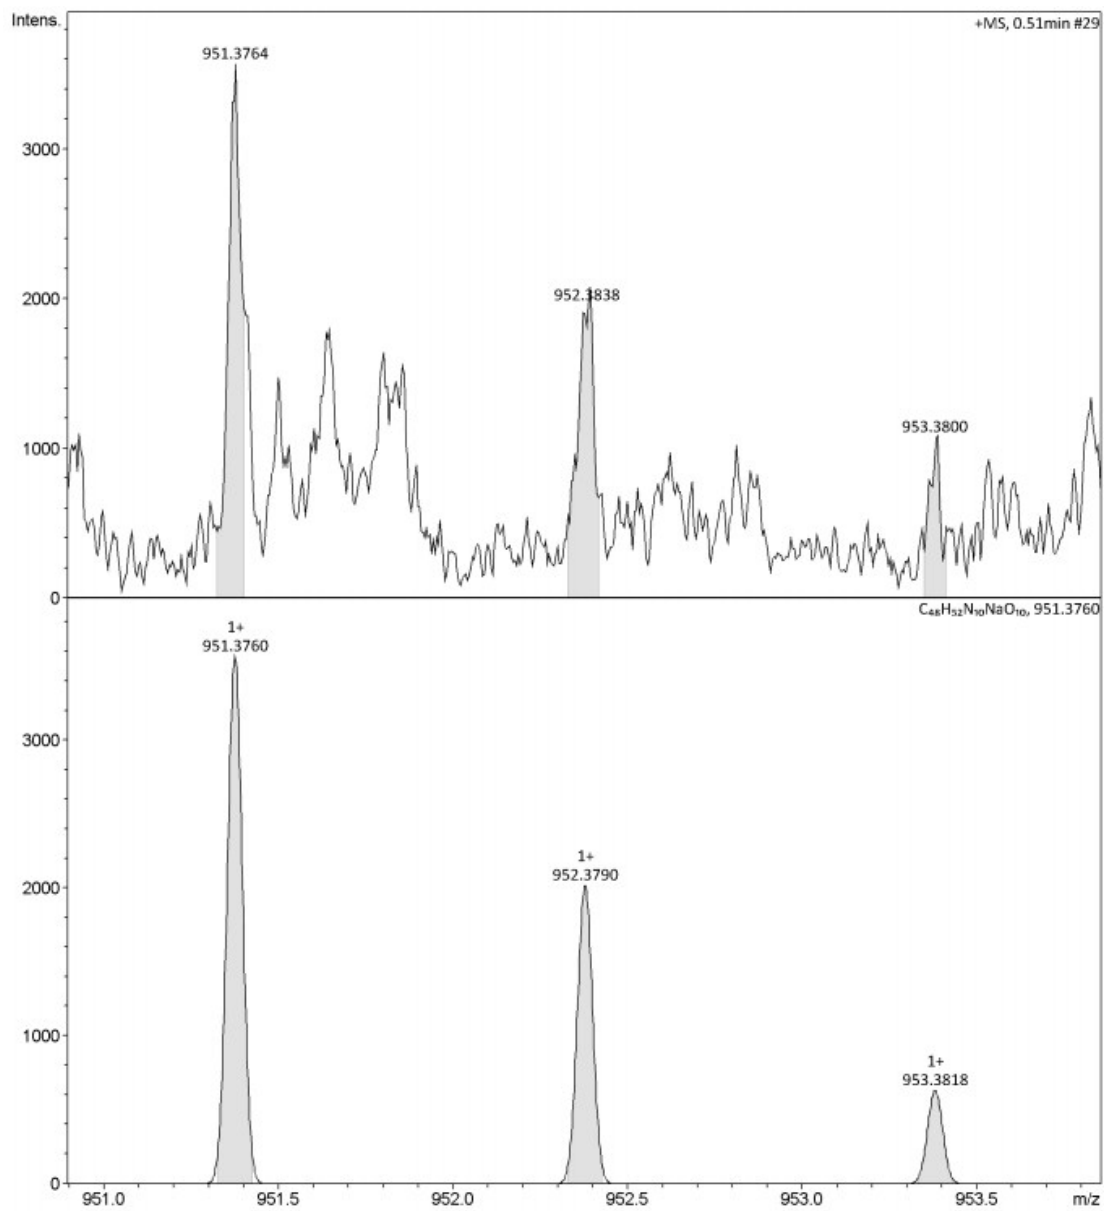

Figure S3. HRMS-ESI spectrum of receptor 1.

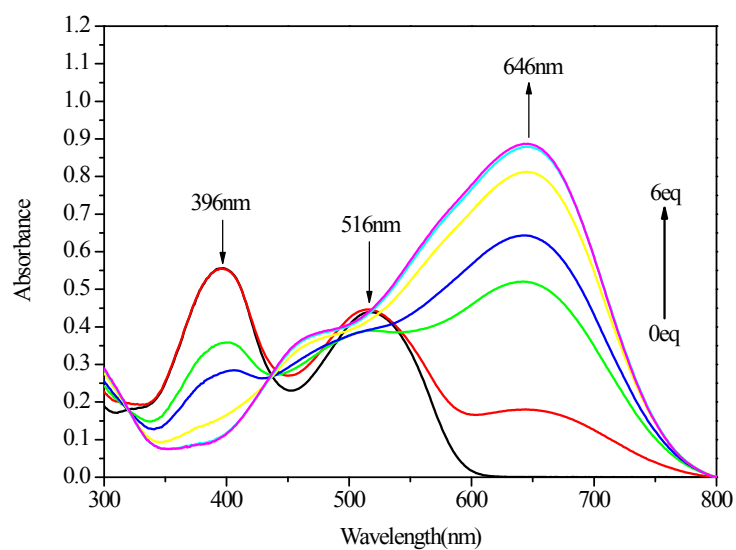

Figure S4. The absorption spectra of receptor **1** (10  $\mu$ M) in THF/H<sub>2</sub>O (93/7, v/v) with the addition of different equivalents of hydroxyl ions.

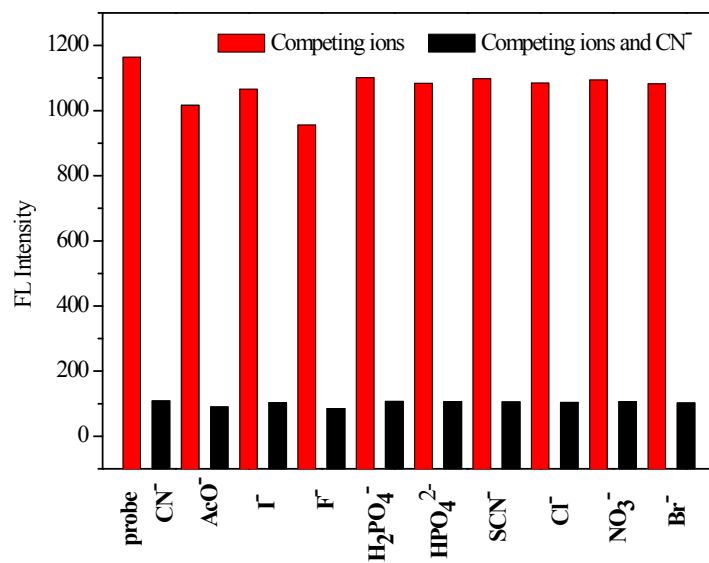

Figure S5. Competing responses of probe **1** (10  $\mu$ M) toward various anions in THF/H<sub>2</sub>O (93/7, v/v).  $\lambda_{ex}$  = 516 nm,  $\lambda_{em}$  = 601 nm.

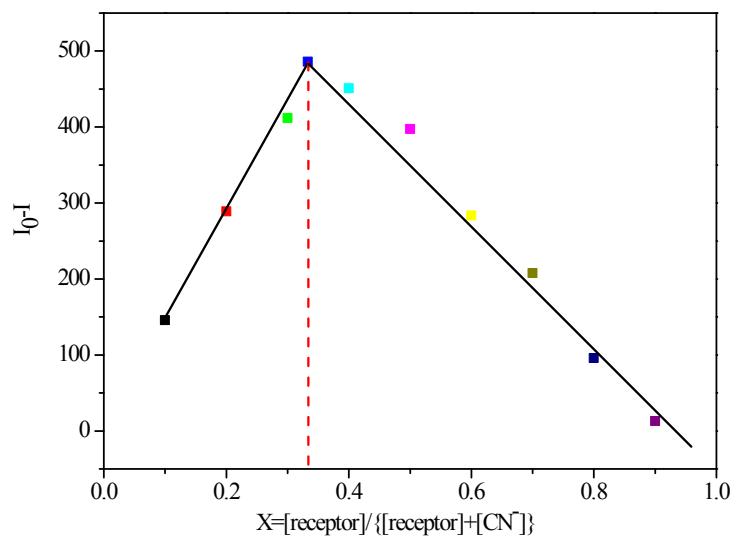

Figure S6. Job's plot for the evolution of binding stoichiometry between receptor **1** and cyanide ions in THF/H<sub>2</sub>O (93/7, v/v) solution. The total concentration of cyanide ions and receptor **1** was 10 μM.

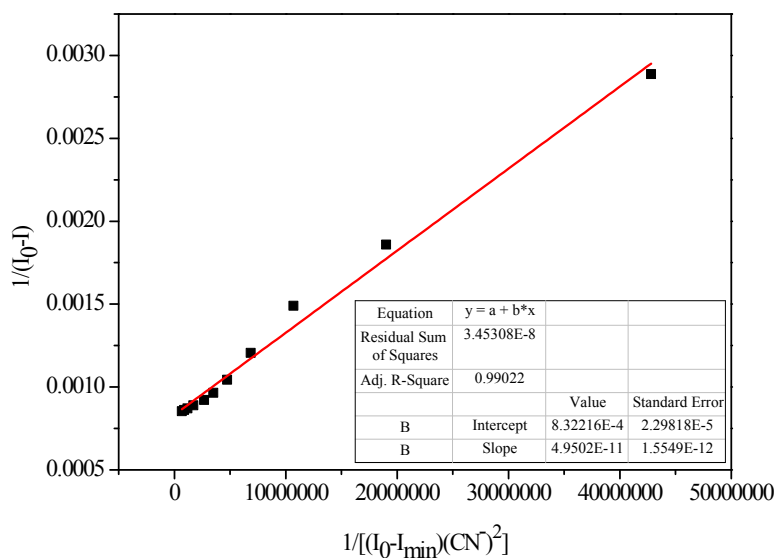

Figure S7. Benesi-Hildebrand plot of receptor **1** (10 μM) using 1:2 stoichiometry for association between receptor **1** and cyanide ions.

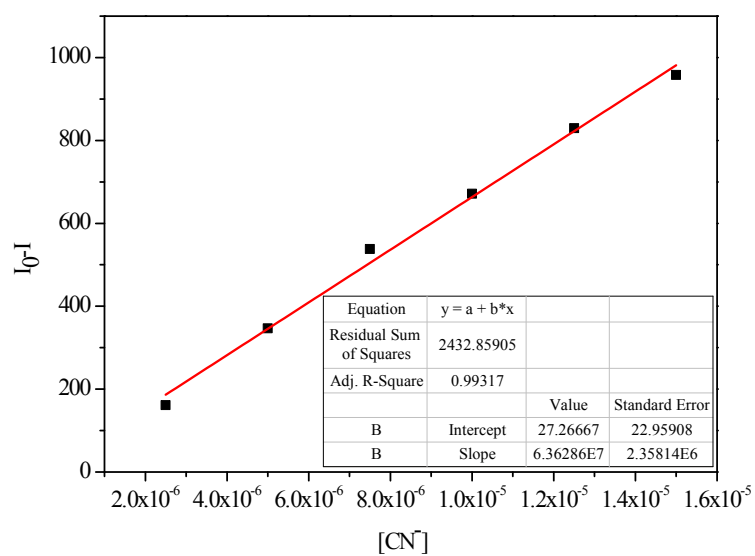

Figure S8. The linear dynamic fluorescence response for the titration of receptor **1** with cyanide ions to determine the limits of detection (LOD).

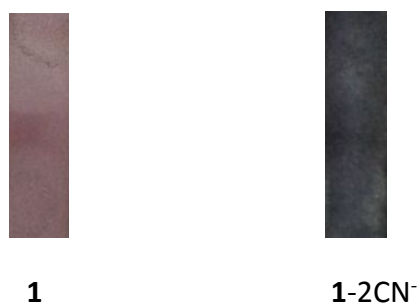

Fig. S9 Color change of **1**-based test strips before and after addition of  $\text{CN}^-$ .
